# Supplementary material for: BRWD3 promotes KDM5 degradation to maintain H3K4 methylation levels
Source: PubMed Central journal article supplement (PMC10081218; doi:10.1101/2023.03.28.534572), 2023-03-28
Supplement: media-1.pdf [file media-1.pdf]

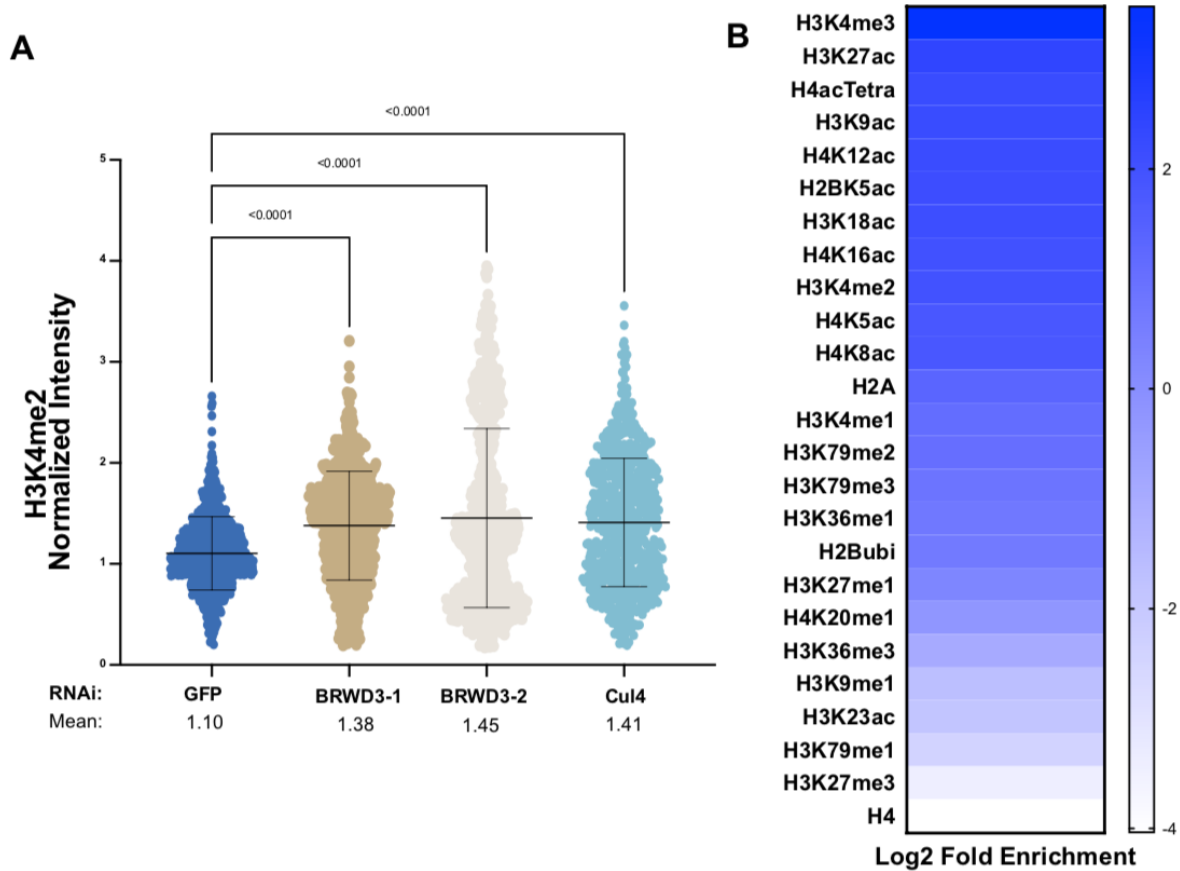

**Supplemental Figure 1. BRWD3 affects H3K4 methylation status.** (A) Violin plots of quantitative immunofluorescence experiments in *Drosophila* S2 cells using an anti-H3K4me2 antibodies. Each distribution represents the signal intensities of 1000 randomly selected cells from three biological replicates. \*\*\*\* $p < 0.0001$  ANOVA one-way analysis with Tukey's multiple comparisons test. (B) Significant enrichment of all published histone modifications within BRWD3 binding sites. Log<sub>2</sub>-fold enrichment for observed overlap relative to expected overlap for each mark peak set is shown.

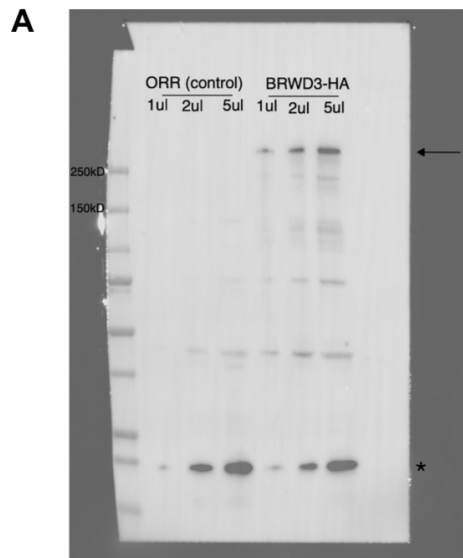

**Supplemental Figure 2. Verification of endogenously HA-tagged BRWD3.** Western blot samples were prepared from endogenously HA-tagged BRWD3 embryos (0-24h) or ORR negative control embryos (0-24h), probing with an anti-HA antibody. Arrow indicates BRWD3-HA (~270 kD). Asterisk indicates non-specific bands recognized by anti-HA antibody (both in ORR control and BRWD3-HA).

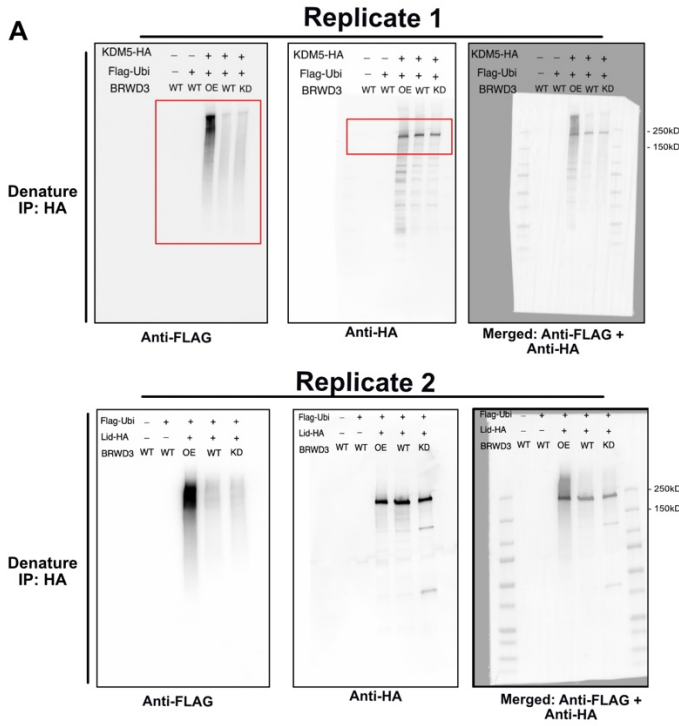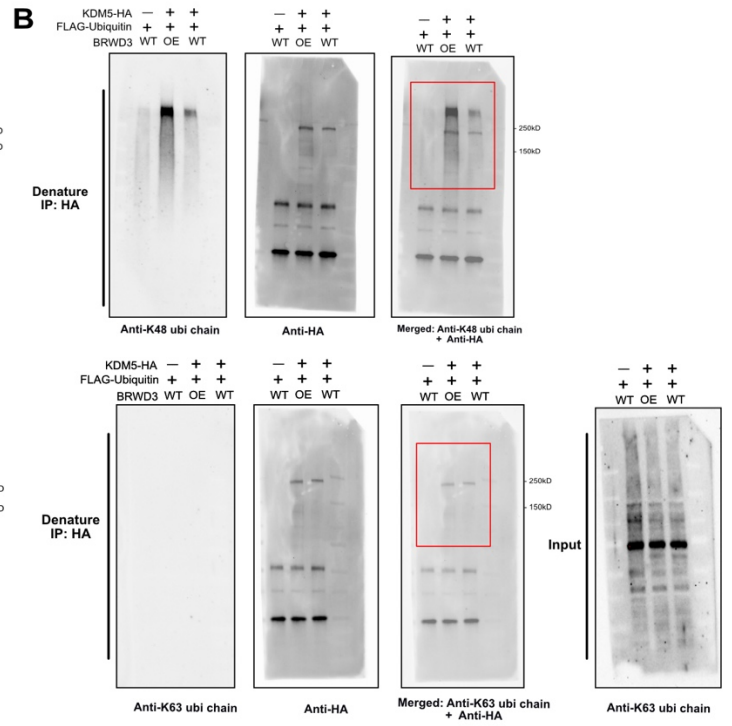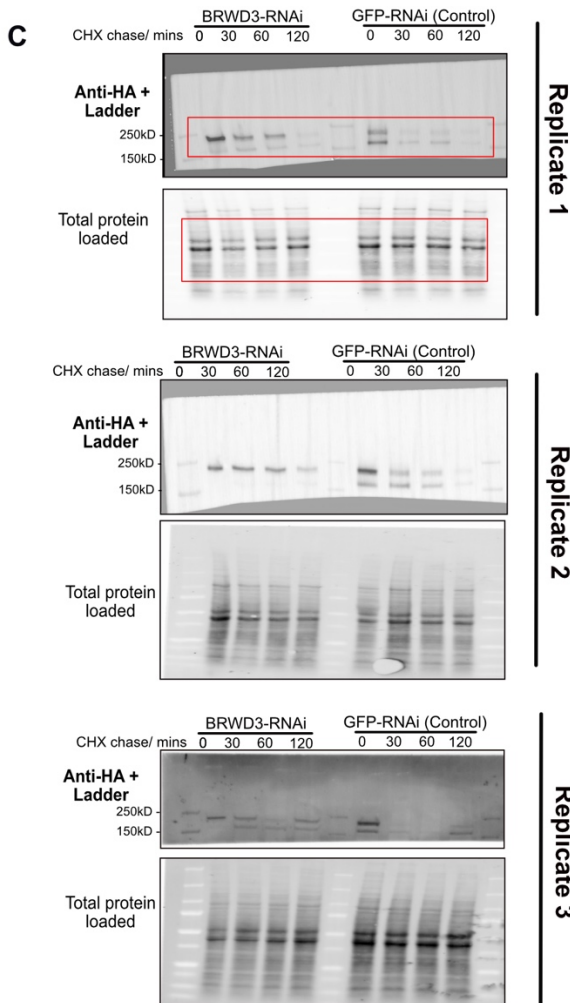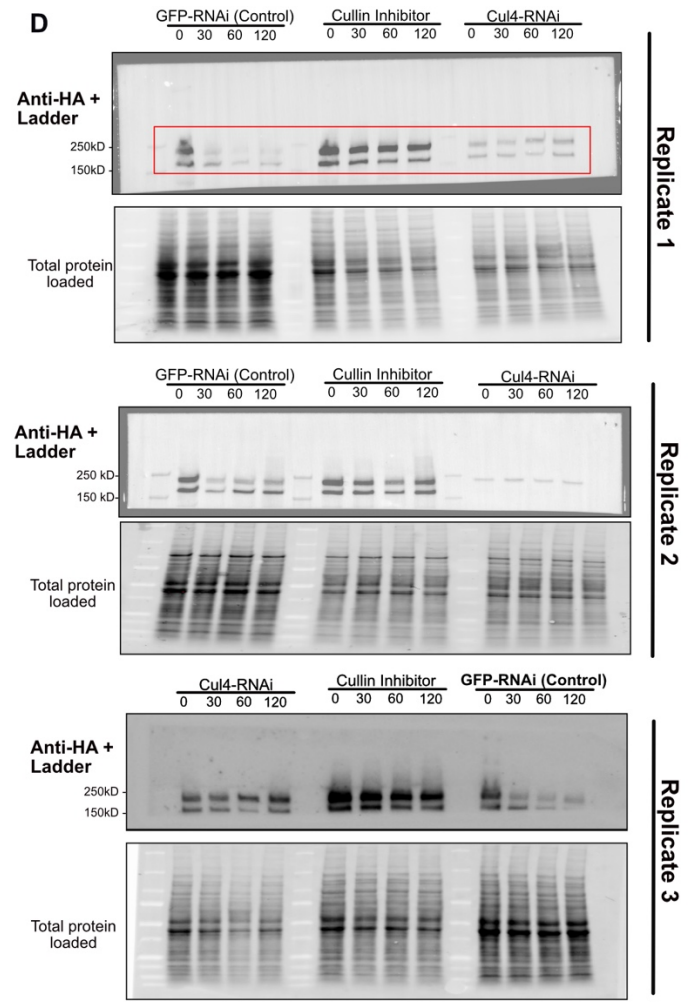

**Supplemental Figure 3. BRWD3 promotes KDM5 ubiquitination and degradation.** Full Western blots and additional replicates used for Figure 3 in the main text. Red boxes indicate cropped regions. (A) Two biological replicates for the denaturing HA-immunoprecipitation followed by Western blots in Fig. 3A are shown. Blots were probed with anti-FLAG (left) and anti-HA (middle) antibodies. The transfection conditions and *BRWD3* expression conditions are indicated on the top. (B) Full Western blots for ubiquitin chain-type specific antibody probing after denaturing HA-IP in Fig. 3B. Separated channels for anti-K48-linked polyubiquitin chains (upper, left) and anti-HA (upper, middle) antibodies, and merged channels (upper, right). Similar order is shown with an anti-K63-linked polyubiquitin antibody (lower). The input samples were blotted with anti-K63-linked polyubiquitin antibody and showed signal (lower, right). (C) Full Western blots for cycloheximide assays under *BRWD3*-RNAi or *GFP*-RNAi conditions used in Fig. 3D. Two more replicates are shown below. (D) Full Western blot for cycloheximide assays under *Cul4*-RNAi, Cullin inhibitor incubation, or *GFP*-RNAi conditions used in Fig. 3F.

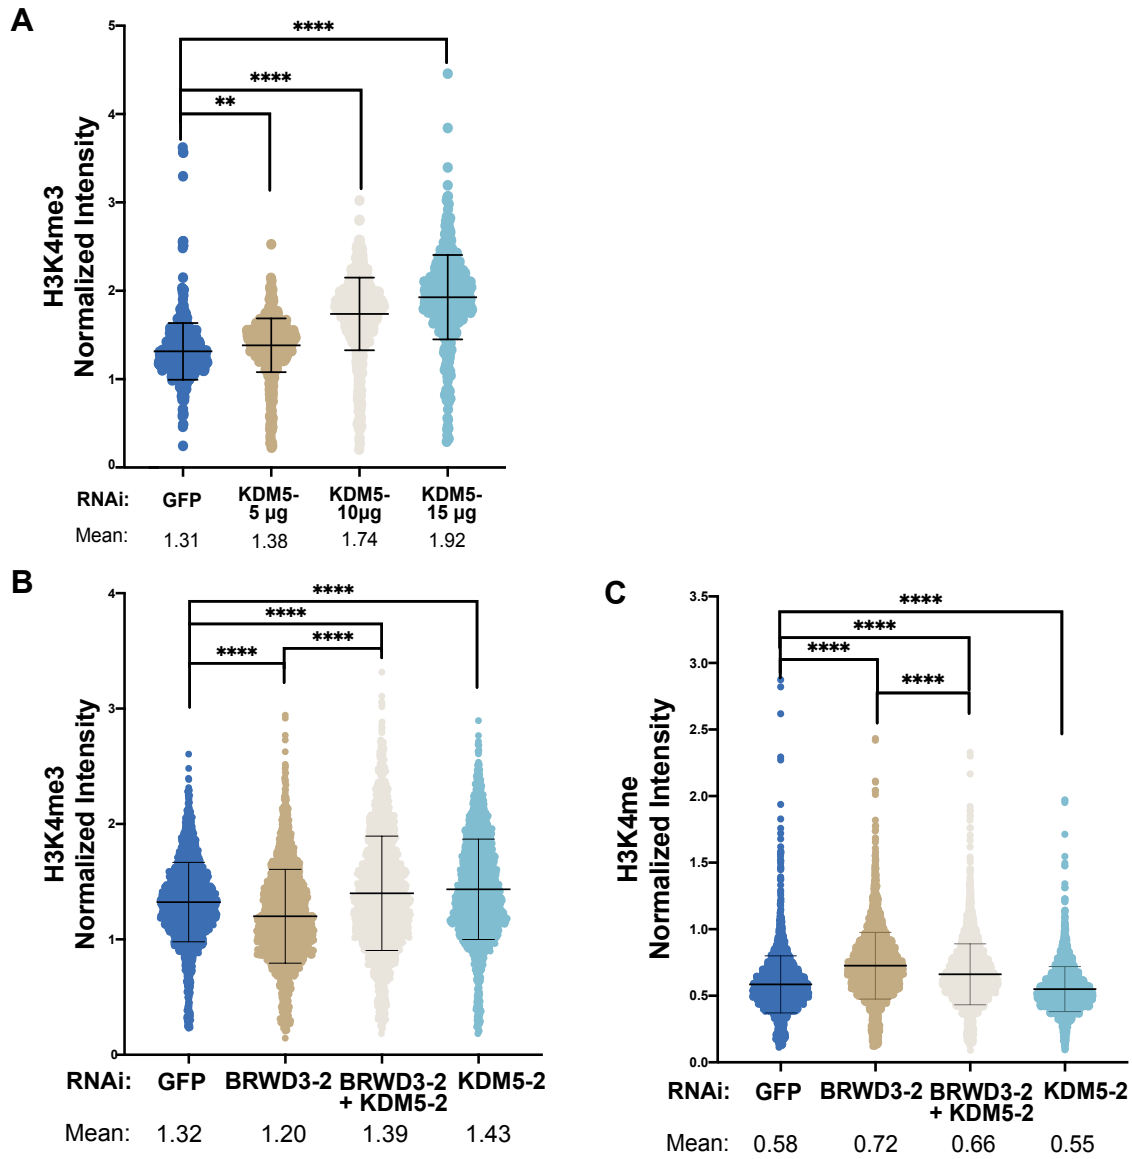

**Supplemental Figure 4. Inhibition of KDM5 with an independent set of dsRNAs restores altered H3K4 methylation levels upon BRWD3 depletion.** Violin plot quantitative immunofluorescence assays plot in *Drosophila* S2 cells using an anti-H3K4me3 antibody (A, B) or an anti-H3K4me1 antibody (C) with different dsRNA treatments. \*\* $p < 0.01$ , \*\*\*\* $p < 0.0001$  using ANOVA one-way analysis with Tukey's multiple comparisons test.
